# Supplementary material for: Risk-averse personalities have a systemically potentiated neuroendocrine stress axis: A multilevel experiment in Parus major
Source: PubMed Central journal article supplement (PMC5552616; doi:10.1016/j.yhbeh.2017.05.011), 2017-07
Supplement: mmc2.pdf [file mmc2.pdf]

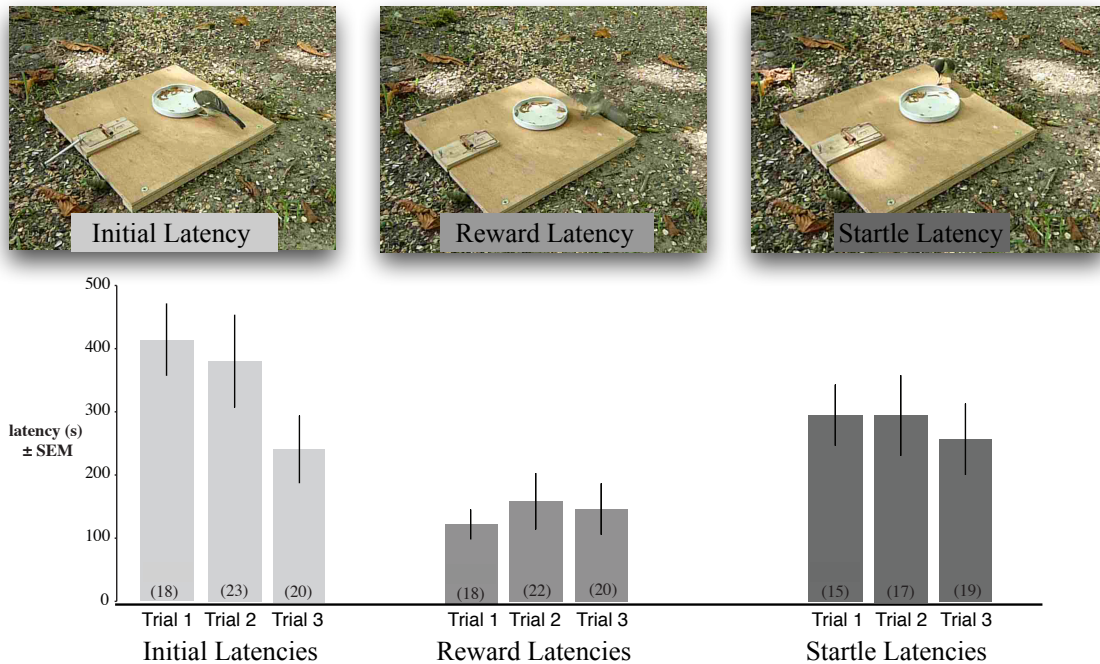

**S2.** Descriptive statistics for behavioral latencies. Light grey bars represent the Initial Latencies (neophobia response); medium grey bars represent the Reward Latencies; dark grey bars represent the Startle Latencies (risk-taking response). Values in parentheses indicate number of completed trials. There was a significant main effect of latency type (mean  $\pm$  SD, sec: Initial Latencies:  $347.8 \pm$

**S2.** Descriptive statistics for behavioral latencies. Light grey bars represent the Initial Latencies (neophobia response); medium grey bars represent the Reward Latencies; dark grey bars represent the Startle Latencies (risk-taking response). Values in parentheses indicate number of completed trials. There was a significant main effect of latency type (mean  $\pm$  SD, sec: Initial Latencies:  $347.8 \pm 279.9$ ; Reward Latencies:  $143.5 \pm 163.8$ ; Startle Latencies:  $283.3 \pm 232.0$ ;  $F_2=22.82$ ,  $p=2 \times 10^{-6}$ ). There was no main effect of repeat number ( $F_2=1.54$ ,  $p=0.233$ ), suggesting that there was generally no habituation/sensitization effect of repeated measurements. There was, however, an interaction between latency type and repeat number ( $F_4=3.08$ ,  $p=0.024$ ), which was due to a reduction in the Initial Latencies between the first and second repeated trials (pairwise comparison:  $p=0.01$ ; no other pairwise comparison was significant), perhaps suggesting that Initial Latency measurements are sensitive to repeated measures wherein birds become habituated as the novelty of the platform declines.
