# Supplementary material for: Risk-averse personalities have a systemically potentiated neuroendocrine stress axis: A multilevel experiment in Parus major
Source: PubMed Central journal article supplement (PMC5552616; doi:10.1016/j.yhbeh.2017.05.011), 2017-07
Supplement: mmc3.pdf [file mmc3.pdf]

### S3

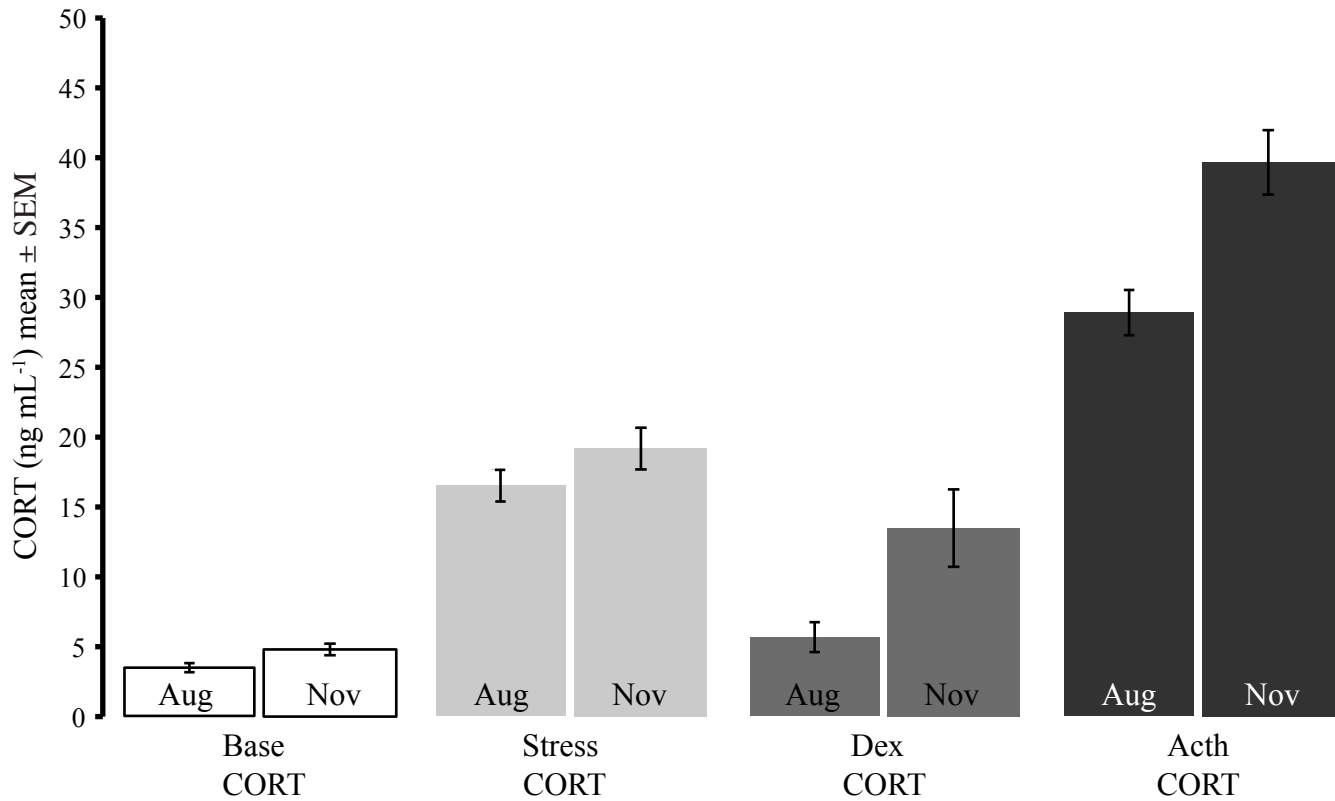

**S3.** Repeated HPA assessments #1 (August 2012) and #2 (November 2012). Corticosterone concentrations were lower in August (main effect of season:  $F_{1,24}=24.29$ ,  $p<5\times 10^{-6}$ ) and there was a main effect of HPA component ( $F_{3,72}=186.8$ ,  $p=1\times 10^{-7}$ ). Lastly, there was an interaction effect between season and HPA component ( $F_{3,72}=25.06$ ,  $p<1\times 10^{-7}$ ), driven by weakened negative feedback (higher DexCORT) in November and a concomitant increase in adrenal sensitivity (higher ActhCORT). These results mirror the validation study (see S1).
