# Supplementary material for: Risk-averse personalities have a systemically potentiated neuroendocrine stress axis: A multilevel experiment in Parus major
Source: PubMed Central journal article supplement (PMC5552616; doi:10.1016/j.yhbeh.2017.05.011), 2017-07
Supplement: mmc4.pdf [file mmc4.pdf]

## S4

| Trait            |                        | R    | 95CI      | Nest ID | Nest ID 95CI |
|------------------|------------------------|------|-----------|---------|--------------|
| <b>Behaviour</b> |                        |      |           |         |              |
| Initial Latency  | Adjusted <sup>§</sup>  | 0.34 | 0.11–0.62 | -       | -            |
| Reward Latency   | Adjusted <sup>§</sup>  | 0.55 | 0.24–0.75 | -       | -            |
| Startle Latency  | Adjusted <sup>§</sup>  | 0.53 | 0.22–0.77 | -       | -            |
| <b>HPA</b>       |                        |      |           |         |              |
| BaseCORT         | Adjusted <sup>§</sup>  | 0.09 | 0.02–0.35 | 0.11    | 0.03–0.48    |
|                  | Adjusted <sup>††</sup> | 0.10 | 0.02–0.40 | 0.12    | 0.03–0.46    |
| StressCORT       | Adjusted <sup>§</sup>  | 0.12 | 0.03–0.44 | 0.12    | 0.03–0.42    |
| DexCORT          | Adjusted <sup>§</sup>  | 0.31 | 0.7–0.62  | 0.12    | 0.03–0.52    |
| ActhCORT         | Adjusted <sup>§</sup>  | 0.27 | 0.07–0.61 | 0.20    | 0.05–0.58    |

<sup>§</sup> Adjusted repeatabilities have SMI and fat score fitted as fixed effects (covariates) and individual as random effect for the R column and individual and nest of origin for the Nest ID column.

<sup>††</sup> Adjusted repeatabilities have SMI fitted as a fixed effect (covariate) and fat score fitted as a fixed effect (factor).
