# Supplementary material for: Risk-averse personalities have a systemically potentiated neuroendocrine stress axis: A multilevel experiment in Parus major
Source: PubMed Central journal article supplement (PMC5552616; doi:10.1016/j.yhbeh.2017.05.011), 2017-07
Supplement: mmc6.pdf [file mmc6.pdf]

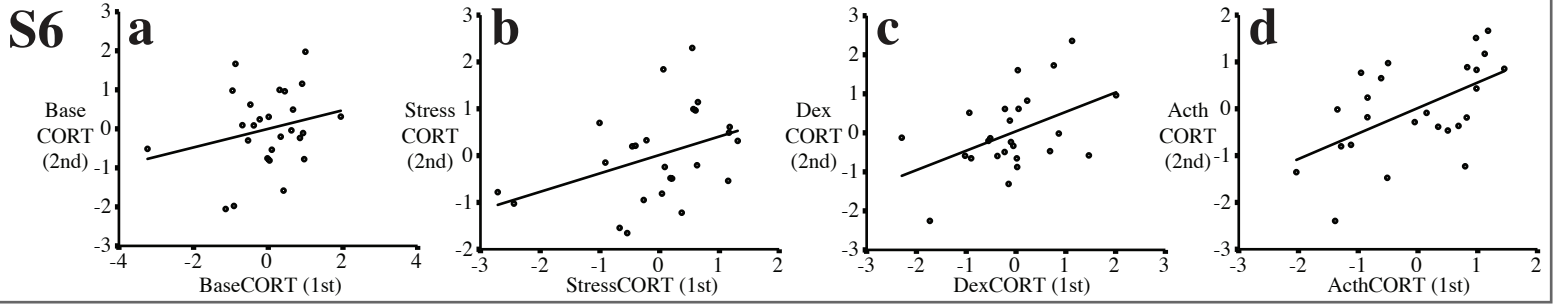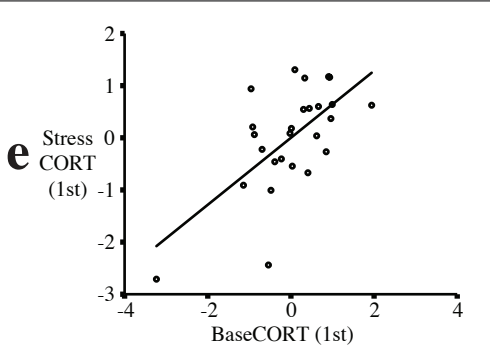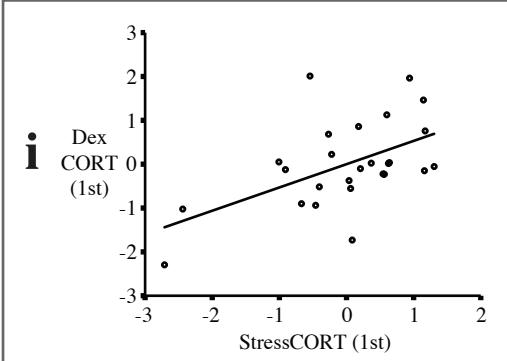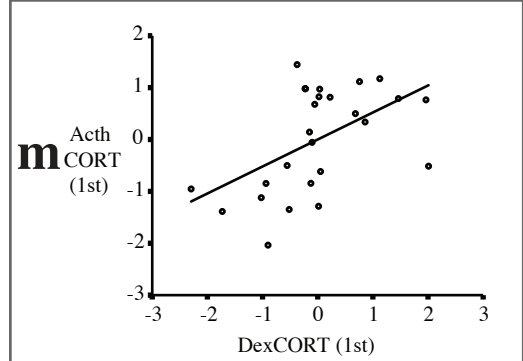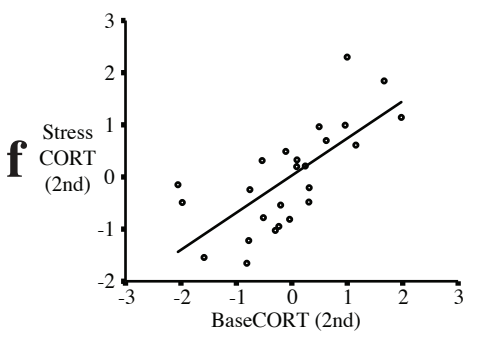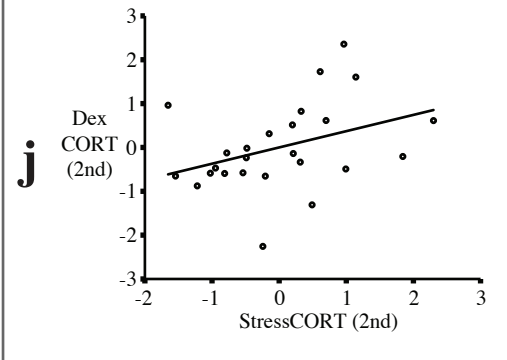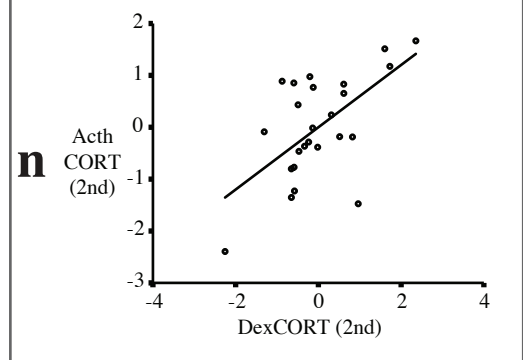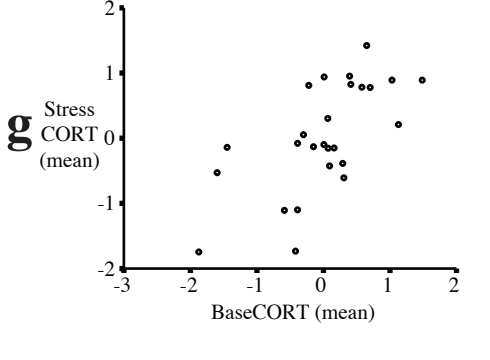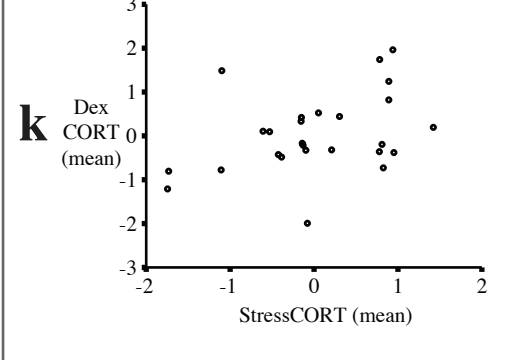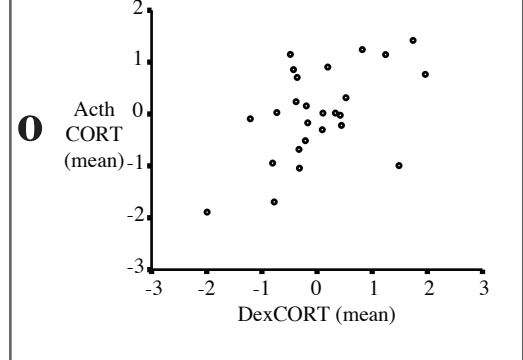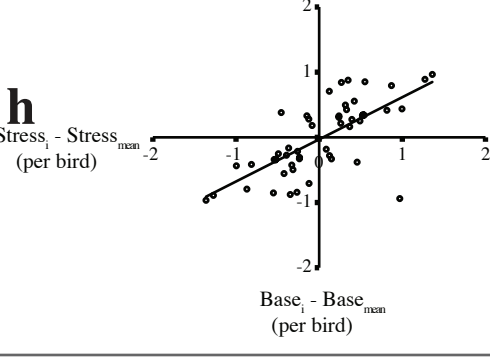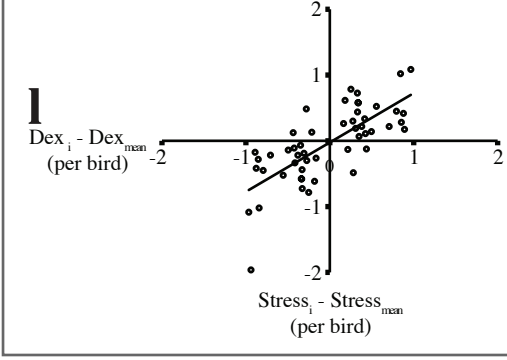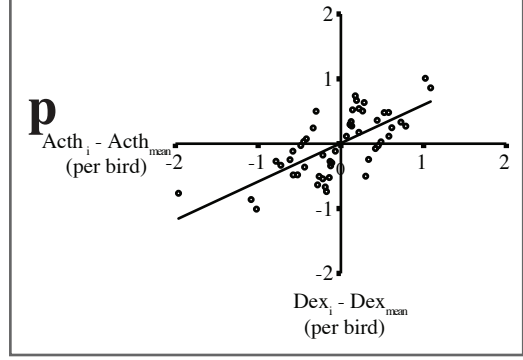

**S6.** Graphical representations of variance and covariance components for the four HPA components (BaseCORT, StressCORT, DexCORT, ActhCORT). All values are  $\log_{10}$ -transformed and plotted as standardized (z) scores and best fit lines are linear regressions. Plots **a-d** provide an illustration of the repeatability of each trait. Positive correlations graphically indicate repeatable traits. See Table 2 for the repeatability estimates. Plots **e-f** illustrate the phenotypic correlation between BaseCORT and StressCORT (i.e. the correlation between the traits during each sampling period). The positive correlations here indicate that there exists either a within- or an among-individual correlation (or both jointly) between these two traits. Plot **g** shows the correlation between the average (per bird) values of BaseCORT and StressCORT across both repeated HPA assessments. A positive correlation here is graphical evidence of an among-individual correlation (i.e. syndrome) between these two traits. Plot **h** depicts the correlation between the deviation from the average (per bird) values of BaseCORT and StressCORT across both repeated HPA assessments (i.e. each bird has two points on this plot). A positive correlation here is graphical evidence of a within-individual correlation (i.e. plasticity) between these two traits. See Table 3 for the within- and among-individual covariance estimates. Plots **i-l** illustrate the same relationships for StressCORT vs DexCORT, and plots **m-p** do so for DexCORT vs ActhCORT. All graphs with linear regression lines demonstrated statistical significance (see Table 2 for repeatability estimates and Table 3 for the within- and among-individual covariance estimates). See Baugh et al. (2014) for a complete description of these graphical methods.
