# Supplementary material for: Risk-averse personalities have a systemically potentiated neuroendocrine stress axis: A multilevel experiment in Parus major
Source: PubMed Central journal article supplement (PMC5552616; doi:10.1016/j.yhbeh.2017.05.011), 2017-07
Supplement: mmc8.pdf [file mmc8.pdf]

**S8.** Component loadings and variance explained for items in the principal components analyses. All data were  $\log_{10}$  transformed and z-standardized prior to PCA analysis.

| PCA                          | Variance Explained:<br>PC1 | Items           | PC1 loadings   | Communalities  | N        | KMO   | Bartlett ( $\chi^2$ , df, p-value) |
|------------------------------|----------------------------|-----------------|----------------|----------------|----------|-------|------------------------------------|
| <b>Behavioural Latencies</b> |                            |                 |                |                |          |       |                                    |
| Initial, Reward, Startle     | 71.8%                      | Initial         | 0.899          | 0.807          | 14       | 0.666 | 11.8, 3, 0.008                     |
|                              |                            | Reward Startle  | 0.855<br>0.783 | 0.733<br>0.611 | 14<br>14 |       |                                    |
| Initial, Startle             | 78.2%                      | Initial Startle | 0.885<br>0.885 | 0.782<br>0.782 | 14<br>14 | 0.500 | 4.42, 1, 0.036                     |
| <b>HPA-CORT</b>              |                            |                 |                |                |          |       |                                    |
| Base, Stress, Dex, Acth      | 63.0%                      | Base            | 0.731          | 0.535          | 25       | 0.693 | 32.3, 6, 0.00001                   |
|                              |                            | Stress          | 0.909          | 0.827          | 25       |       |                                    |
|                              |                            | Dex             | 0.761          | 0.579          | 25       |       |                                    |
|                              |                            | Acth            | 0.759          | 0.576          | 25       |       |                                    |
| Base, Stress                 | 82.1%                      | Base Stress     | 0.906<br>0.906 | 0.821<br>0.821 | 25<br>25 | 0.500 | 11.98, 1, 0.001                    |
| Dex, Acth                    | 73.4%                      | Dex Acth        | 0.857<br>0.857 | 0.734<br>0.734 | 25<br>25 | 0.500 | 5.58, 1, 0.018                     |
| <b>MR &amp; GR</b>           |                            |                 |                |                |          |       |                                    |
| MR in HP & PVN               | 88.5%                      | HP              | 0.941          | 0.885          | 23       | 0.500 | 18.48, 1, 0.00001                  |
|                              |                            | PVN             | 0.941          | 0.885          | 23       |       |                                    |
| GR in HP & PVN               | 69.3%                      | HP PVN          | 0.833<br>0.833 | 0.693<br>0.693 | 23<br>23 | 0.500 | 3.31, 1, 0.06                      |

**Correlations among hormone and behavior principal components:**

We used the correlation matrix to compute PC scores without factor rotation. KMO: Kaiser-Meyer-Olkin measure of sampling adequacy and Bartlett's test of sphericity are included. The first principal component (PC1) for all three behavioral measurements (*Initial Latency*, *Reward Latency*, *Startle Latency*) was positively and significantly correlated with PC1 for all four hormones (*BaseCORT*, *StressCORT*, *DexCORT*, *ActhCORT*):  $r=0.487$ ,  $R^2=0.237$ ,  $F_{1,12}=3.726$ ,  $p=0.078$ ; Spearman's  $\rho=0.565$ ,  $p=0.035$ ,  $N=14$ . PC1 for two behaviors of particular interest that showed an among-individual correlation (*Initial Latency*, *Startle Latency*) was positively and significantly correlated with PC1 for all four hormones (*BaseCORT*, *StressCORT*, *DexCORT*, *ActhCORT*):  $r=0.652$ ,  $R^2=0.425$ ,  $F_{1,12}=8.861$ ,  $p=0.012$ ; Spearman's  $\rho=0.600$ ,  $p=0.023$ ,  $N=14$ . PC1 for two behaviors of particular interest that showed an among-individual correlation (*Initial Latency*, *Startle Latency*) was positively and significantly correlated with PC1 for two hormones exhibiting trends for among-individual correlations (*BaseCORT*, *StressCORT*):  $r=0.608$ ,  $R^2=0.370$ ,  $F_{1,12}=7.051$ ,  $p=0.021$ ; Spearman's  $\rho=0.613$ ,  $p=0.020$ ,  $N=14$ . PC1 for two behaviors of particular interest and ones that show an among-individual correlation (*Initial Latency*, *Startle Latency*) was positively and significantly correlated with PC1 for two hormones exhibiting trends for among-individual correlations (*DexCORT*, *ActhCORT*):  $r=0.648$ ,  $R^2=0.420$ ,  $F_{1,12}=8.690$ ,  $p=0.012$ ; Spearman's  $\rho=0.653$ ,  $p=0.011$ ,  $N=14$ . Despite small sample sizes the principal component estimates appear to successfully reduce these variable sets to biologically meaningful components, suggesting that both the behavioral and hormonal traits are highly integrated.
